# Supplementary material
Source: HighWire-hosted journal article supplement (https://gut.bmj.com/content/68/5/905)
Supplement: inline-supplementary-material-1 [file inline-supplementary-material-1.pdf]

## **Supplemental Information**

### **Supplemental experimental procedures**

#### **PBMC isolation**

Peripheral blood mononuclear cells (PBMCs) were isolated from EDTA anti-coagulated blood samples through Pancoll (Pan-Biotech, Germany) density gradient centrifugation. For all analyses, frozen PBMCs were thawed in complete medium (RPMI 1640 with 10% fetal bovine serum, 1% penicillin/streptomycin and 1.5% 1M HEPES (all Thermo Fisher, Germany)).

#### **Multiparametric flow cytometry**

The following antibodies were used for multi-parametric flow cytometry: anti-CCR7 (150503), anti-CD8 (RPA-T8), anti-CD8 (SK1), anti-CD38 (HB7), anti-CD39 (TU66), anti-CD45RA (HI100), anti-CD107a (H4A3), anti-IFN $\gamma$  (25723.11), anti-TNF (MAb11, 1:50) (BD Biosciences, Germany), anti-2B4 (C1.7), anti-BCL2 (100) anti-CCR7 (G043H7), anti-CD8 (HIT8a), anti-CD45RA (HI100), anti-CD127 (A019D5), anti-IFN $\gamma$  (4S.B3), anti-PD1 (EH12.2H7), anti-Rabbit IgG (Poly4064) (BioLegend, UK), anti-2B4 (eBioC1.7), anti-CD14 (61D3), anti-CD19 (HIB19), anti-Eomes (WD1928), anti-KLRG1 (13F12F2), anti-T-bet (4B10), anti-TIGIT (MBSA43) (eBioscience, Germany) and anti-TCF1 (C63D9) (Cell signaling, Germany). Fixable Viability Dyes eFluor780 (eBioscience) and 7-AAD (BD) were used for live/dead discrimination. Fixation/Permeabilization Solution Kit (BD Biosciences, Germany) and FoxP3/Transcription Factor Staining Buffer Set (eBioscience, Germany) were applied according to the manufacturer's instructions to stain for cytoplasmic and intranuclear molecules, respectively. Analyses were performed using a FACSCanto II or an LSRFortessa (BD). Data were evaluated with FlowJo (Treestar, USA).

#### **HBV-specific CD8<sup>+</sup> T-cell clones**

Core<sub>18</sub><sup>-</sup> and pol<sub>455</sub>-specific CD8<sup>+</sup> T-cell clones were generated by sorting of tetramer<sup>+</sup>CD8<sup>+</sup> T cells obtained from two HLA-A\*02 positive cHBV patients. Sorted single cells were plated in 96-well plates together with irradiated HD-derived feeder cells. Cells were initially stimulated with phytohemagglutinin at a final concentration of 40 $\mu$ g/mL (Sigma-Aldrich, Germany) and expanded for several weeks. Clones were grown in RPMI 1640 with 10% human serum (Sigma-Aldrich) and 1% penicillin/streptomycin and were supplemented with 100 U/mL rIL-2 twice a week.

## HBV infection of HepG2-hNTCP cells

HepG2-hNTCP cells were infected with HBV inoculum (kindly provided by S. Urban) at a MOI of 1,000 in complete DMEM medium (DMEM with 10% fetal bovine serum, 1% penicillin/streptomycin and 1% MEM non-essential amino acid solution (all Thermo Fisher) supplemented with 2% DMSO (AppliChem, Germany) and 4% PEG 8,000 (Sigma-Aldrich). 300,000 hepatoma cells were seeded per well on 12-well plates coated with Collagen I. After overnight incubation the inoculum was removed, cells were washed three times with PBS and replication medium (complete DMEM supplemented with 2% DMSO) was added. Medium was replaced every second day.

## Antiviral efficacy of HBV-specific CD8<sup>+</sup> T cells

Co-culture assays were conducted 7 days post infection as previously described [1]. Briefly, infected HepG2-hNTCP cells were harvested, pooled and reseeded in complete DMEM medium on Collagen I-coated 24-well plates at 250,000 hepatoma cells per well. Subsequently, effector cells (either HBV-specific CD8<sup>+</sup> T-cell clones or *in vitro* expanded HBV-specific CD8<sup>+</sup> T cells) were added at desired effector to target cell ratios (E:T ratio). Co-culture assays were conducted for 72 h and cytoplasmic HBV DNA was isolated using the QIAamp DNA Blood Mini Kit according to the manufacturer's instructions. Cytoplasmic HBV DNA was quantified as artificial units relative to a plasmid standard using the LightCycler480 system (Roche Diagnostics). Primers were selected as published by Garson and colleagues [2].

## Assessment of autologous viral sequences

HBV DNA was extracted from patient's plasma using QIAamp UltraSens Virus Kit (Qiagen, Germany) according to the manufacturer's protocol. Two-step nested PCR was performed for viral sequence analyses. Specific primers are listed in below. Sanger sequencing was performed at GATC Biotech (Germany).

| Epitope                                      | PCR             | Forward Primer          | Reverse Primer               |
|----------------------------------------------|-----------------|-------------------------|------------------------------|
| core <sub>18</sub>                           | 1 <sup>st</sup> | CACCTCTGCCTAATCATCTC    | CCGGAAGTGTTGATAAGATAGG       |
|                                              | 2 <sup>nd</sup> | ACTGTTCAAGCCTCCAAGCTG   | GAGGAGTGCGAATCCACACTC        |
| pol <sub>455</sub> and<br>env <sub>183</sub> | 1 <sup>st</sup> | ACCAAACCTCTGCARGATCCCAG | TGGTGGCTCCAGTTCAGGAAC        |
|                                              | 2 <sup>nd</sup> | TGGTGGCTCCAGTTCAGGAAC   | ATCAATAGGCCTGTTAACAGGAA<br>G |
| core <sub>141</sub>                          | 1 <sup>st</sup> | TTCGCTTCACCTCTGCACGT    | GCGACGCGGIGATTGAGAYCT        |
|                                              | 2 <sup>nd</sup> | TGTCAACGACCGACCTTGAGG   | CGTCTGCGAGGYGAGGGAGTTC       |
| pol <sub>173</sub>                           | 1 <sup>st</sup> | CCAATTTATGCCTACAGCCTC   | GGAGTGTGGATTTCGCACTCC        |
|                                              | 2 <sup>nd</sup> | CAATTTATGCCTACAGCCTCCTA | AGACCACCAAATGCCCTATC         |

## Supplemental Figures

A

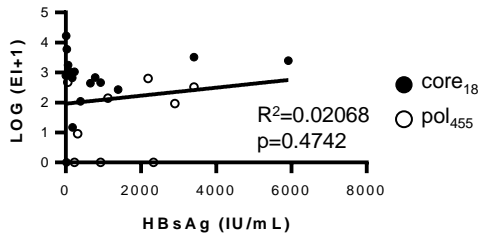

B

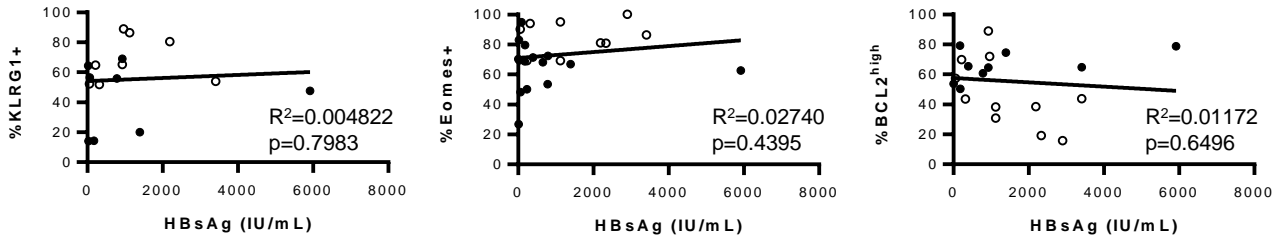

**SI Figure 1. Serum HBsAg levels do not correlate with the exhaustion profile of HBV epitope-specific CD8+ T cells.** Correlation analyses of serum HBsAg levels and the expansion factor (A) and frequency of HBV epitope-specific CD8+ T cells expressing KLRG1, Eomes, TCF1 or BCL2 (B). Naïve-like (CD45RA+CCR7+) epitope-specific CD8+ T cells were excluded from marker expression analyses. Each dot represents one epitope-specific CD8+ T-cell population enriched from one individual patient. Bars indicate the median with IQR. Statistical significance was assessed using linear regression analyses.

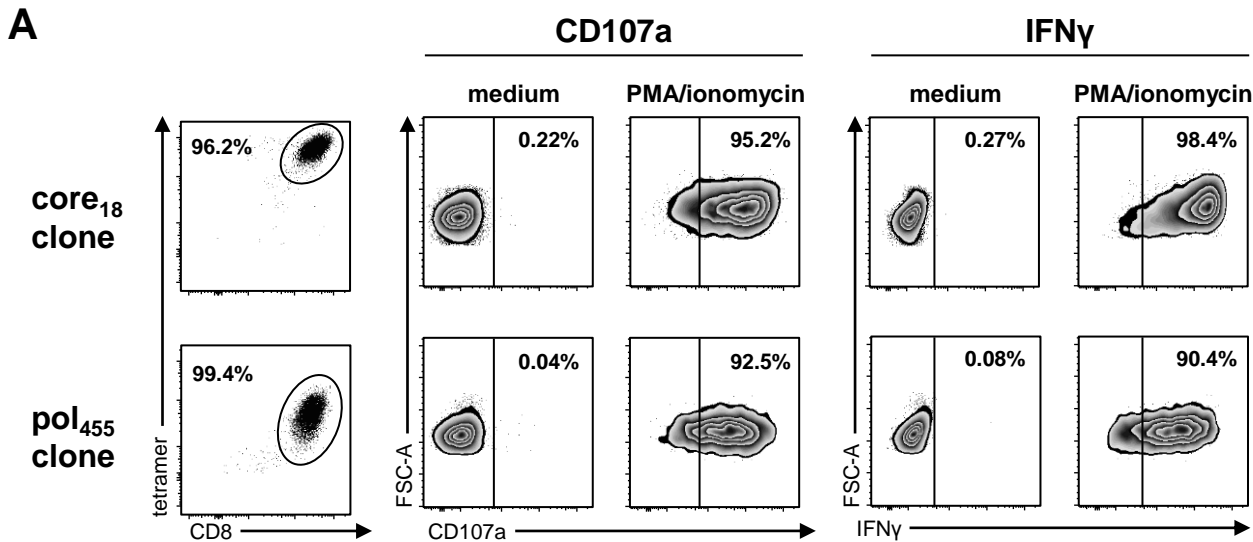

**B** HBV-specific CD8+ T-cell clones

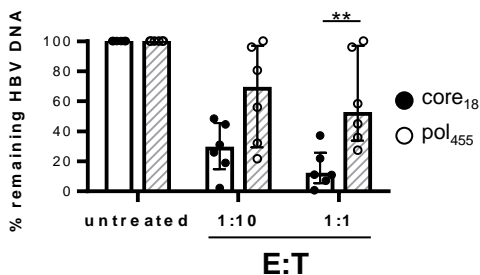

**C** *In vitro* expanded HBV-specific CD8+ T cells

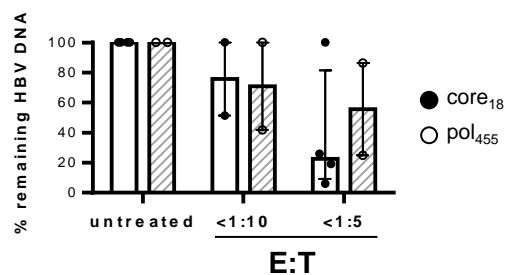

**SI Figure 2. Antiviral efficacy of HBV-specific CD8+ T cells.** (A) Core<sub>18</sub>- (upper panel) and pol<sub>455</sub>-specific CD8+ T-cell clones (lower panel) were stimulated overnight with PMA (50 ng/mL) and ionomycin (1  $\mu$ g/mL) to assess their effector functions in terms of degranulation (right) and IFN $\gamma$  production (left). HBV-infected HepG2-hNTCP cells were co-cultured with either core<sub>18</sub>- or pol<sub>455</sub>-specific CD8+ T-cell clones (B) or *in vitro* expanded HBV-specific CD8+ T cells of chronically HBV-infected patients (C) for 72h. Antiviral efficacy is depicted as remaining HBV DNA and was calculated relative to HBV DNA in untreated samples (without CD8+ T cells). Bars indicate the median with IQR. Statistical significance was assessed using Mann-Whitney test (\*\*,  $p < 0.01$ ).

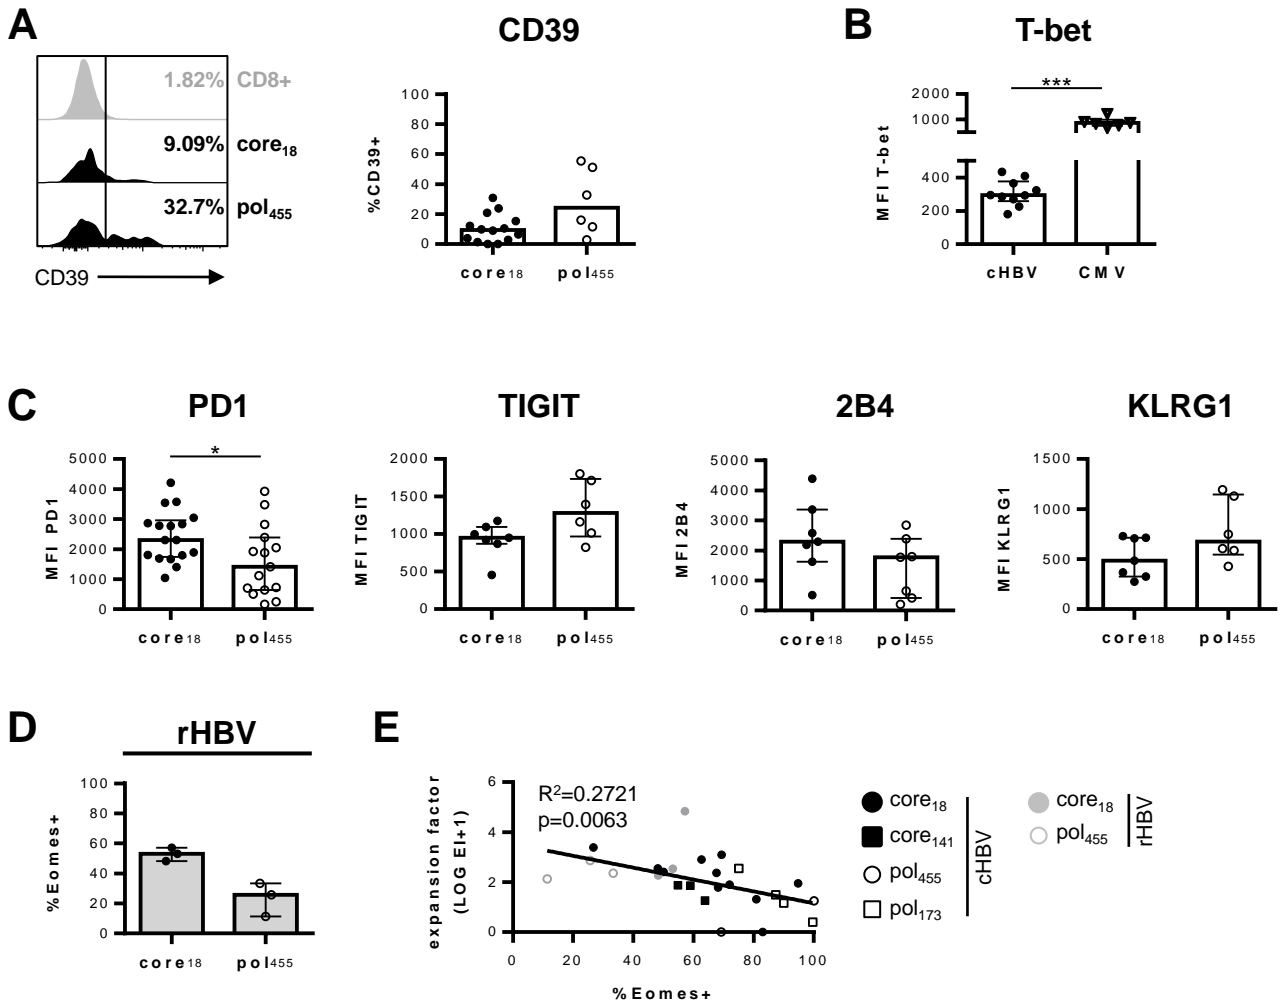

**SI Figure 3. Eomes expression negatively correlates with the expansion capacity of HBV-specific CD8+ T cells.** (A) Proportion of CD39-expressing core<sub>18</sub>- versus pol<sub>455</sub>-specific CD8+ T cells. (B) T-bet expression levels of HBV-specific CD8+ T cells compared to CMV-specific CD8+ T cells depicted by median fluorescence intensity (MFI). (C) Expression levels of the inhibitory receptors PD1, TIGIT, 2B4 and KLRG1 on core<sub>18</sub>- versus pol<sub>455</sub>-specific CD8+ T-cell populations obtained from cHBV patients with low viral load. (D) Frequency of Eomes+ cells among enriched HBV epitope-specific CD8+ T cells obtained from patients after resolved HBV infection (rHBV). (E) Correlation of the expansion and the frequency of Eomes-expressing HBV-specific CD8+ T cells obtained from cHBV (black) and rHBV (grey) patients. Naïve-like (CD45RA+CCR7+) epitope-specific CD8+ T cells were excluded from marker expression analyses. Each dot represents one epitope-specific CD8+ T-cell population enriched from one individual patient. Bars indicate the median with IQR. Statistical significance was assessed using unpaired t-test with Welch's correction (C PD1), Mann-Whitney test (A, B, C TIGIT, 2B4, KLRG1, D), and linear regression analysis (E) (\*,  $p < 0.05$ ; \*\*\*,  $p < 0.001$ ).

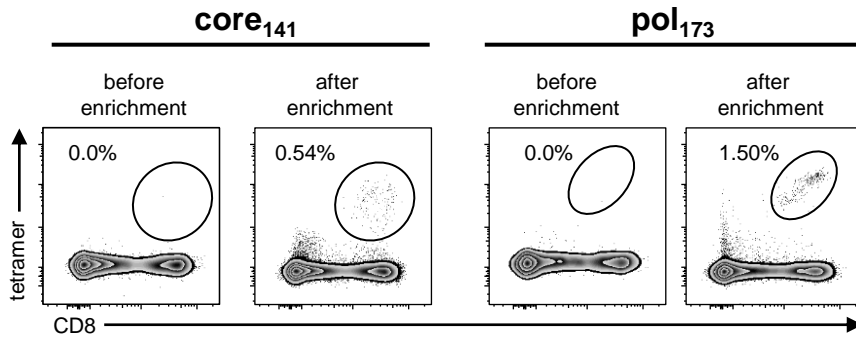

**SI Figure 4. pMHC I tetramer-based magnetic bead enrichment of HLA\*A11- and HLA\*B35-restricted HBV-specific CD8+ T cells in CHBV patients with low viral load.** Representative flow cytometry analyses showing HLA\*A11-restricted core<sub>141</sub>-specific CD8+ T cells (left) and HLA\*B35 pol<sub>173</sub>-specific CD8+ T cell populations (right) obtained from CHBV patients before and after pMHC I tetramer-based enrichment. Frequency of core<sub>141</sub> and pol<sub>173</sub> epitope-specific CD8+ T cells within the total CD8+ T-cell population is indicated.

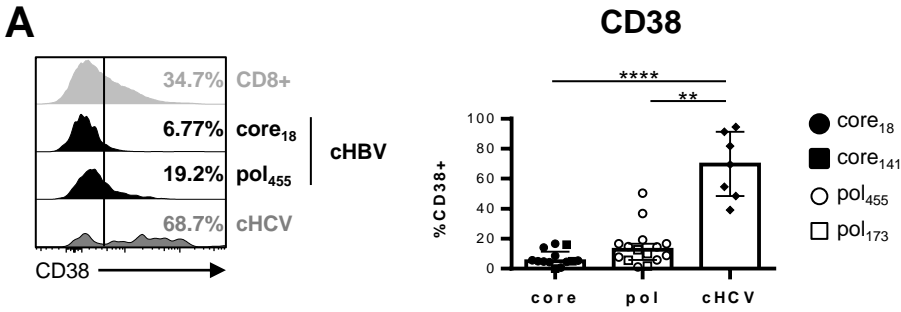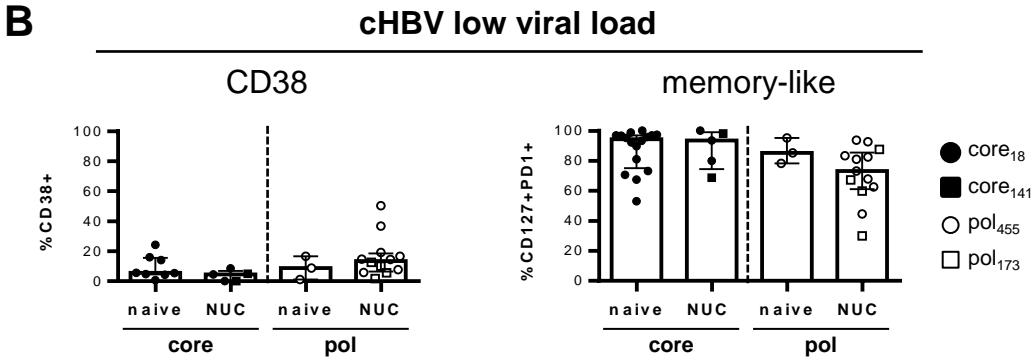

**SI Figure 5: Low level CD38 expression and CD127/PD1 subset distribution of HBV-specific CD8+ T cells is similar in inactive carriers and NUC-treated patients with low viral load.** (A) *Ex vivo* CD38 expression of enriched HBV-specific CD8+ T cells from cHBV patients in comparison to HCV-specific CD8+ T-cell populations in cHCV infection. (C) CD38 expression (left) and frequency of memory-like CD127+PD1+ cells of enriched HBV core<sub>18/141</sub>- versus pol<sub>455/173</sub>-specific CD8+ T cells (right) from treatment-naïve compared to NUC-treated cHBV patients with low viral load. Naïve-like (CD45RA+CCR7+) epitope-specific CD8+ T cells were excluded from marker expression analyses. Each dot represents one epitope-specific CD8+ T-cell population from one individual patient. Bars indicate the median with IQR. Statistical analysis were performed via Kuskal-Wallis test (A) and Mann-Whitney test (B, C) (\*,  $p < 0.05$ ; \*\*,  $p < 0.01$ ; \*\*\*\*,  $p < 0.0001$ ).

## Supplemental Tables

**SI Table 1: Study cohort of HLA-A\*02 negative cHBV patients.** ALT: alanine transaminase, f: female, HBsAg: Hepatitis B surface antigen, m: male, nd: not done, VL: viral load.

| <b>Patient ID</b> | <b>Age (years)</b> | <b>Sex</b> | <b>VL (IU/mL)</b> | <b>HBsAg (IU/mL)</b> | <b>ALT (U/L)</b> | <b>Therapy</b> | <b>WT viral sequences</b>                | <b>detectable CD8+ T-cell response</b> |
|-------------------|--------------------|------------|-------------------|----------------------|------------------|----------------|------------------------------------------|----------------------------------------|
| cHBV50            | 39                 | f          | <10               | nd                   | 36               | naive          | core <sup>141</sup>                      | -                                      |
| cHBV51            | 41                 | f          | 2662              | nd                   | 16               | naive          | core <sup>141</sup> , pol <sup>173</sup> | -                                      |
| cHBV52            | 22                 | m          | 2399              | nd                   | 27               | naive          | core <sup>141</sup> , pol <sup>173</sup> | -                                      |
| cHBV53            | 33                 | f          | 1286              | nd                   | 19               | naive          | core <sup>141</sup> , pol <sup>173</sup> | -                                      |
| cHBV54            | 35                 | m          | 522               | nd                   | 68               | naive          | pol <sup>173</sup>                       | -                                      |
| cHBV55            | 41                 | f          | 976               | 250                  | 23               | naive          | pol <sup>173</sup>                       | -                                      |
| cHBV56            | 46                 | m          | 526               | 31501                | 27               | naive          | core <sup>141</sup>                      | core <sup>141</sup>                    |
| cHBV57            | 44                 | m          | 45                | nd                   | 29               | naive          | core <sup>141</sup>                      | -                                      |
| cHBV58            | 30                 | f          | 1287              | 11289.89             | 19               | naive          | core <sup>141</sup>                      | -                                      |
| cHBV59            | 50                 | f          | 10                | 0.05                 | 12               | naive          | core <sup>141</sup>                      | -                                      |
| cHBV60            | 41                 | m          | 466               | nd                   | 47               | naive          | core <sup>141</sup>                      | -                                      |
| cHBV61            | 27                 | m          | 451               | nd                   | 28               | naive          | core <sup>141</sup>                      | -                                      |
| cHBV62            | 43                 | f          | 37                | nd                   | 15               | naive          | core <sup>141</sup>                      | -                                      |
| cHBV63            | 49                 | f          | 3658              | nd                   | 16               | naive          | pol <sup>173</sup>                       | -                                      |
| cHBV64            | 38                 | m          | 26                | nd                   | nd               | naive          | pol <sup>173</sup>                       | -                                      |
| cHBV65            | 33                 | m          | 313               | 6621.08              | 34               | naive          | pol <sup>173</sup>                       | -                                      |
| cHBV66            | 37                 | m          | <10               | nd                   | 55               | Entecavir      | pol <sup>173</sup>                       | -                                      |
| cHBV67            | 56                 | f          | <10               | nd                   | 28               | Entecavir      | core <sup>141</sup>                      | -                                      |
| cHBV68            | 34                 | m          | 2522              | nd                   | 47               | Entecavir      | core <sup>141</sup>                      | core <sup>141</sup>                    |
| cHBV69            | 39                 | m          | 14                | nd                   | 33               | Entecavir      | core <sup>141</sup>                      | -                                      |
| cHBV70            | 69                 | f          | <10               | nd                   | 21               | Entecavir      | pol <sup>173</sup>                       | -                                      |
| cHBV71            | 52                 | f          | <10               | 524.96               | 10               | Entecavir      | pol <sup>173</sup>                       | pol <sup>173</sup>                     |
| cHBV72            | 48                 | f          | 44                | nd                   | 31               | Entecavir      | pol <sup>173</sup>                       | -                                      |
| cHBV73            | 36                 | m          | 45                | 7355.08              | 22               | Entecavir      | pol <sup>173</sup>                       | -                                      |
| cHBV74            | 68                 | m          | <10               | nd                   | 27               | Telbivudin     | core <sup>141</sup>                      | -                                      |
| cHBV75            | 19                 | m          | <10               | nd                   | 32               | Tenofovir      | core <sup>141</sup>                      | -                                      |
| cHBV76            | 27                 |            | 10                | nd                   | 47               | Tenofovir      | core <sup>141</sup> , pol <sup>173</sup> | -                                      |
| cHBV77            | 21                 | f          | <10               | nd                   | 28               | Tenofovir      | core <sup>141</sup> , pol <sup>173</sup> | pol <sup>173</sup>                     |
| cHBV78            | 55                 | m          | <10               | nd                   | 24               | Tenofovir      | core <sup>141</sup> , pol <sup>173</sup> | core <sup>141</sup>                    |
| cHBV79            | 64                 | m          | 871               | nd                   | 28               | Tenofovir      | pol <sup>173</sup>                       | pol <sup>173</sup>                     |
| cHBV80            | 52                 | f          | <10               | nd                   | 15               | Tenofovir      | pol <sup>173</sup>                       | pol <sup>173</sup>                     |
| cHBV81            | 32                 | m          | <10               | nd                   | 42               | Tenofovir      | pol <sup>173</sup>                       | -                                      |
| cHBV82            | 30                 | f          | 38                | nd                   | 50               | Tenofovir      | core <sup>141</sup>                      | -                                      |
| cHBV83            | 24                 | m          | 13                | nd                   | 128              | Tenofovir      | core <sup>141</sup>                      | -                                      |
| cHBV84            | 29                 | f          | 1365              | nd                   | nd               | Tenofovir      | core <sup>141</sup>                      | -                                      |
| cHBV85            | 21                 | m          | 804               | 116842               | nd               | Tenofovir      | pol <sup>173</sup>                       | -                                      |



**SI Table 2: Study cohort of patients with resolved HBV infection.** All patients were tested positive for HBcAg and anti-HBs, while serum HBsAg levels were negative. Serum HBV DNA was under the detection limit. ALT: alanine transaminase, f: female, m: male.

| <b>Patient ID</b> | <b>Age (years)</b> | <b>Sex</b> | <b>ALT (U/L)</b> | <b>detectable CD8+ T-cell response</b>  |
|-------------------|--------------------|------------|------------------|-----------------------------------------|
| rHBV1             | 59                 | f          | 20               | -                                       |
| rHBV2             | 38                 | m          | 49               | core <sup>18</sup> , pol <sup>455</sup> |
| rHBV3             | 43                 | f          | 15               | -                                       |
| rHBV4             | 54                 | m          | 8                | core <sup>18</sup> , pol <sup>455</sup> |
| rHBV5             | 36                 | m          | 30               | core <sup>18</sup>                      |
| rHBV6             | 79                 | f          | 12               | -                                       |
| rHBV7             | 64                 | f          | 14               | -                                       |
| rHBV8             | 64                 | m          | 34               | pol <sup>455</sup>                      |
| rHBV9             | 61                 | f          | 76               | -                                       |
| rHBV10            | 31                 | f          | 50               | -                                       |

**SI Table 3: Study cohort of cHCV patients.** ALT: alanine transaminase, f: female, m: male, nd: not done, VL: viral load.

| Patient ID | Age (years) | Sex | VL (IU/mL) | ALT (U/L) | Genotype | WT viral sequences                        | detectable CD8+ T-cell response           |
|------------|-------------|-----|------------|-----------|----------|-------------------------------------------|-------------------------------------------|
| cHCV1      | 53          | m   | 431530     | 60        | 1a       | NS3 <sub>1073</sub> , NS3 <sub>1406</sub> | NS3 <sub>1073</sub> , NS3 <sub>1406</sub> |
| cHCV2      | 48          | f   | nd         | 23        | 1a       | NS3 <sub>1073</sub>                       | NS3 <sub>1073</sub>                       |
| cHCV3      | 55          | m   | 2030000    | 151       | 1a       | NS3 <sub>1073</sub>                       | NS3 <sub>1073</sub>                       |
| cHCV4      | 45          | f   | 685910     | 62        | 1a       | NS3 <sub>1073</sub>                       | NS3 <sub>1073</sub>                       |
| cHCV5      | 64          | f   | 7332185    | 75        | 1a       | NS3 <sub>1073</sub>                       | NS3 <sub>1073</sub>                       |
| cHCV6      | 33          | m   | nd         | 70        | 1b       | NS3 <sub>1073</sub>                       | NS3 <sub>1073</sub>                       |

**SI Table 4: Study cohort of cHBV patients before NUC therapy.** Patient details of matched samples during NUC treatment are depicted in Table 1 and SI Table 2. ALT: alanine transaminase, f: female, HBeAg: Hepatitis B virus precore antigen, HBsAg: Hepatitis B virus surface antigen, m: male, VL: viral load, nd: not determined, neg: negative, pos: positive.

| Patient ID | Age (years) | Sex | VL (IU/mL)       | HBsAg (IU/mL) | HBeAg | ALT (U/L) | WT viral sequences                       | detectable CD8+ T-cell response         |
|------------|-------------|-----|------------------|---------------|-------|-----------|------------------------------------------|-----------------------------------------|
| cHBV34     | 46          | f   | 828919           | 458.83        | neg   | 87        | pol <sup>455</sup>                       | pol <sup>455</sup>                      |
| cHBV45     | 31          | f   | 15176            | 961.82        | neg   | 29        | core <sup>18</sup> , pol <sup>455</sup>  | core <sup>18</sup> , pol <sup>455</sup> |
| cHBV65     | 32          | m   | 1113989          | nd            | neg   | 296       | pol <sup>173</sup>                       | -                                       |
| cHBV75     | 16          | m   | 446745506        | nd            | neg   | 725       | core <sup>141</sup>                      | -                                       |
| cHBV76     | 23          | m   | >10 <sup>9</sup> | nd            | pos   | 72        | core <sup>141</sup> , pol <sup>173</sup> | -                                       |
| cHBV80     | 51          | f   | 24553            | nd            | neg   | 19        | pol <sup>173</sup>                       | pol <sup>173</sup>                      |
| cHBV83     | 19          | m   | 554625718        | nd            | pos   | 78        | core <sup>141</sup>                      | -                                       |
| cHBV86     | 39          | f   | 8598533          | nd            | neg   | 513       | pol <sup>173</sup>                       | -                                       |
| cHBV87     | 36          | m   | 2754229          | nd            | nd    | 58        | pol <sup>173</sup>                       | -                                       |
| cHBV88     | 32          | m   | 3185613          | 5305.79       | neg   | 54        | core <sup>18</sup> , pol <sup>455</sup>  | core <sup>18</sup> , pol <sup>455</sup> |

## **Supplemental References**

- 1 Hoh A, Heeg M, Ni Y, Schuch A, Binder B, Hennecke N, et al. Hepatitis B virus-infected HepG2hNTCP cells serve as a novel immunological tool to analyze the antiviral efficacy of CD8+ T cells in vitro. *J Virol* 2015; **89**:7433-8
- 2 Garson JA, Grant PR, Ayliffe U, Ferns RB, Tedder RS. Real-time PCR quantitation of hepatitis B virus DNA using automated sample preparation and murine cytomegalovirus internal control. *J Virol Methods* 2005; **126**:207-13
